# Supplementary material for: Using real-time modelling to optimise an outbreak response: Insights from the 2017 Ebola outbreak in the Democratic Republic of the Congo
Source: Research Square preprint supplement (doi:10.21203/rs.3.rs-3951663/v1), 2024-02-19
Supplement: Supplementary file 1 [file 00c3f7bc2edfcbeefb0a8ee7.pdf]

**Supplementary Information for *Using real-time modelling to optimise an outbreak response: Insights from the 2017 Ebola outbreak in the Democratic Republic of the Congo***

RN Thompson, WS Hart, M Keita, IS Fall, AS Gueye, D Chamla, M Mossoko, S Ahuka-Mundeke, J Nsio-Mbeta, T Jombart, J Polonsky

Supplementary Figure

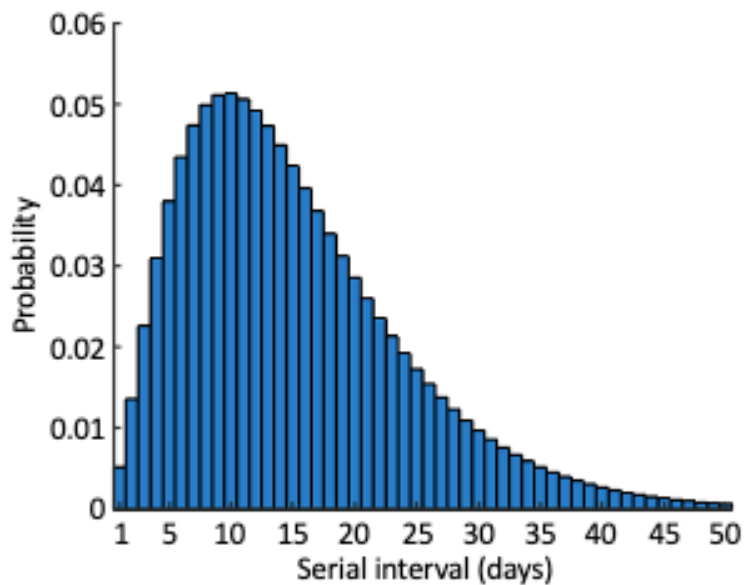

**Figure S1.** The discrete serial interval distribution assumed in our analyses. To obtain this distribution, the continuous serial interval was assumed to be a gamma distribution with mean 15.3 days and standard deviation 9.3 days [1]. The continuous distribution was then discretised using the method from [2] (see also equation (1) in the main text).

**References**

1. Van Kerkhove MD, Bento AI, Mills HL, Ferguson NM, Donnelly CA. A review of epidemiological parameters from Ebola outbreaks to inform early public health decision-making. *Sci Data*. 2015;2: 150019.
2. Cori A, Ferguson NM, Fraser C, Cauchemez S. A new framework and software to estimate time-varying reproduction numbers during epidemics. *Am J Epidemiol*. 2013;178: 1505–12.
